# Supplementary material
Source: Springer Nature journal article supplement (https://www.springermedizin.de/resource/supplementary/13012_2013_750_MOESM1_ESM.pdf/9630608)
Supplement: MOESM1 [file 9630608]

Person 45 years or over presents to GP with a joint problem

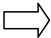

(a painful knee, hip or hand)

### **GP consultation**

Diagnosis and initial management of OA  
GP offers the guidebook and refers to the OA clinic

Patient-centred approach

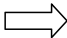

### **OA clinic**

Up to four appointments with a nurse to support the self-management of OA

Exercise

Weight loss

Pain control
